# Supplementary material for: Syntheses of Nymphaea-like BiOCl with oxygen vacancies for effective removal of tetracycline hydrochloride
Source: Royal Society of Chemistry journal article supplement (doi:10.1039/d0ce00417k), 2020-01-01
Supplement: d0ce00417k1.pdf [file d0ce00417k1.pdf]

## Electronic Supplementary Information

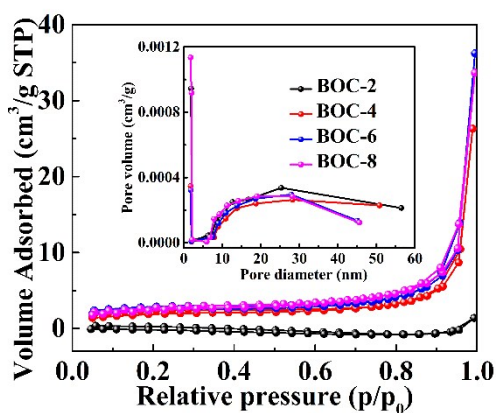

**Fig. S1.** Nitrogen adsorption-desorption isotherms and the corresponding pore-size distributions (inset) of the as-prepared samples.

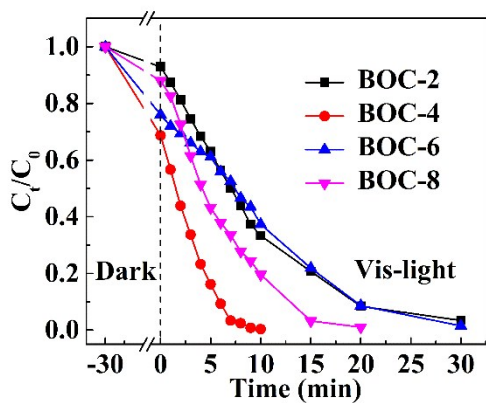

**Fig. S2.** Photocatalytic activity of the as-prepared samples for the degradation of RhB under vis-light irradiation.

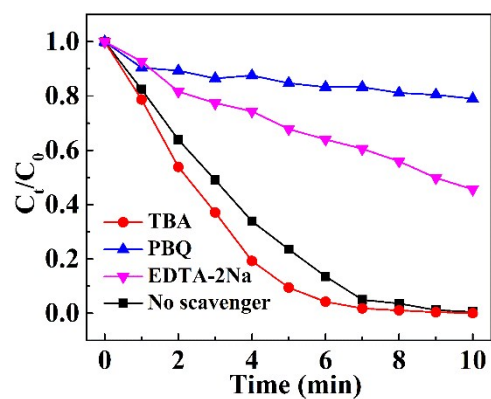

**Fig. S3.** Active species trapping experiments of BOC-4 for degrade RhB under vis-light irradiation.

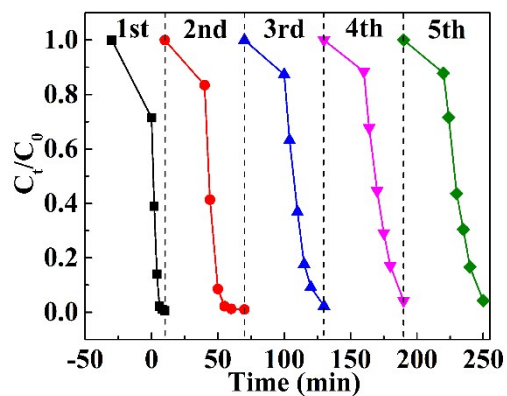

**Fig. S4.** Durability of BOC-4 for remove RhB.
